# Supplementary material
Source: HighWire-hosted journal article supplement (https://www.jpn.ca/highwire/filestream/89417/field_highwire_adjunct_files/0/jpn-170220-1-at.pdf)
Supplement: jpn-170220-1-at.pdf [file jpn-170220-1-at.pdf]

**Appendix 1** to Sehmbi M, Rowley CD, Minuzzi L, et al. Age-related deficits in intracortical myelination in young adults with bipolar disorder type I. *J Psychiatry Neurosci* 2019.

DOI: 10.1503/jpn.170220

Copyright © 2019 The Author(s) or their employer(s). To receive this resource in an accessible format, please contact us at [cmajgroup@cmaj.ca](mailto:cmajgroup@cmaj.ca).

*Online appendices are unedited and posted as supplied by the authors.*

## **SUPPLEMENTARY MATERIAL**

### **Supplementary Methods**

#### **Intracortical Myelin (ICM) Image Processing Methods**

Image processing was performed predominantly in MIPAV v7.0.1 software ([mipav.cit.nih.gov](http://mipav.cit.nih.gov)) using the JIST v3.0 ([www.nitrc.org/projects/jist](http://www.nitrc.org/projects/jist), TOADS-CRUISE vR3c ([www.nitrc.org/projects/toads-cruise](http://www.nitrc.org/projects/toads-cruise)), and CBS High-Res Brain Processing Tools Version v3.0 ([www.nitrc.org/projects/cbs-tools](http://www.nitrc.org/projects/cbs-tools)) plug-ins, and Amira v5.2 software (Visage Imaging). All processing was performed on the ratio image.

First, a mask of the cerebrum created from the SPECTRE 2010 algorithm <sup>1</sup> in MIPAV, was used to skull strip the ratio image. The skull-stripped ratio image was used as input to the Multiple Object Geometric Deformable Model (MGDM) Multi-contrast Brain Segmentation algorithm <sup>2, 3</sup> in MIPAV to generate initial probabilistic labels for tissue classes for each hemisphere of the brain. The probability labels generated for cerebral gray matter (GM) and white matter (WM) were used as the input to the CRUISE algorithm <sup>4</sup> to generate smoothed, topologically correct

**Appendix 1** to Sehmbi M, Rowley CD, Minuzzi L, et al. Age-related deficits in intracortical myelination in young adults with bipolar disorder type I. *J Psychiatry Neurosci* 2019.

DOI: 10.1503/jpn.170220

*Online appendices are unedited and posted as supplied by the authors.*

labels for the cerebrum. The CRUISE algorithm was performed in each hemisphere separately.

Subcortical structures and ventricles (as identified by the MGDM algorithm) were then removed from the labels for the left and right cerebrums and the labels remaining were combined. At this point, all GM segmentations were inspected and manual edits were made to replace missing cortex and to remove remaining dura mater arising from potential errors in the MGDM and CRUISE algorithms to ensure an accurate pial surface. This label for the entire cerebrum without the subcortical structures was then used to mask the Ratio image such that it only contained the cerebral cortex and underlying major white matter tracts.

The manually corrected, cerebrum-masked Ratio image was next segmented into two main tissue classes: WM and GM, taking into account lightly and heavily myelinated components of GM <sup>5</sup> using the FANTASM algorithm <sup>6</sup> in MIPAV, as we found that this yields a more accurate WM label for our ICM analysis than the output from CRUISE. The hemispheres were segmented together to avoid potential hemispheric bias, such that the algorithm used the entire cerebrum for its classification. Following segmentations,

**Appendix 1** to Sehmbi M, Rowley CD, Minuzzi L, et al. Age-related deficits in intracortical myelination in young adults with bipolar disorder type I. *J Psychiatry Neurosci* 2019.

DOI: 10.1503/jpn.170220

*Online appendices are unedited and posted as supplied by the authors.*

labels for each tissue class were split back into left and right hemispheres for subsequent processing. The labels near the GM/WM-boundary were morphologically processed to remove all WM tissue not connected to the largest WM mass.

The corrected GM labels from CRUISE representing the pial surface, and WM labels from FANTASM representing the GM/WM boundary surface were used as inputs to a volume-preserving cortical depth model to generate an intracortical surface at the  $\frac{1}{2}$  cortical depth to sample the  $T_1$ -weighted image signal <sup>7, 8</sup> (**Figure S1**). Each subject's  $\frac{1}{2}$  depth surface was registered to the  $\frac{1}{2}$  depth surface generated from the MNI-152 atlas using a multi-contrast multi-scale surface registration approach <sup>9</sup>. In the analysis, the signal was first sampled onto the individual subject's surface, which was then deformed to be in register with the MNI-152 equivalent surface.

**Appendix 1** to Sehmbi M, Rowley CD, Minuzzi L, et al. Age-related deficits in intracortical myelination in young adults with bipolar disorder type I. *J Psychiatry Neurosci* 2019.

DOI: 10.1503/jpn.170220

*Online appendices are unedited and posted as supplied by the authors.*

## **References**

1. Carass A, Cuzzocreo J, Wheeler MB, Bazin P-L, Resnick SM, Prince JL. Simple paradigm for extra-cerebral tissue removal: algorithm and analysis. *NeuroImage*. 2011;56(4):1982-92.
2. Bazin P-L, Weiss M, Dinse J, Schäfer A, Trampel R, Turner R. A computational framework for ultra-high resolution cortical segmentation at 7Tesla. *Neuroimage*. 2014;93:201-9.

**Appendix 1** to Sehmbi M, Rowley CD, Minuzzi L, et al. Age-related deficits in intracortical myelination in young adults with bipolar disorder type I. *J Psychiatry Neurosci* 2019.

DOI: 10.1503/jpn.170220

*Online appendices are unedited and posted as supplied by the authors.*

3. Bogovic JA, Prince JL, Bazin P-L. A multiple object geometric deformable model for image segmentation. *Computer Vision and Image Understanding*. 2013;117(2):145-57.
4. Han X, Pham DL, Tosun D, Rettmann ME, Xu C, Prince JL. CRUISE: cortical reconstruction using implicit surface evolution. *NeuroImage*. 2004;23(3):997-1012.
5. Rowley CD, Bazin P-L, Tardif CL, Sehmbi M, Hashim E, Zaharieva N, et al. Assessing intracortical myelin in the living human brain using myelinated cortical thickness. *Frontiers in neuroscience*. 2015;9.
6. Pham DL, editor Robust fuzzy segmentation of magnetic resonance images. *Computer-Based Medical Systems, 2001 CBMS 2001 Proceedings 14th IEEE Symposium on; 2001: IEEE*.
7. Waehnert M, Dinse J, Weiss M, Streicher MN, Waehnert P, Geyer S, et al. Anatomically motivated modeling of cortical laminae. *Neuroimage*. 2014;93:210-20.
8. Rowley CD, Sehmbi M, Bazin PL, Tardif CL, Minuzzi L, Frey BN, et al. Age-related mapping of intracortical myelin from late adolescence to middle adulthood using T1-weighted MRI. *Human Brain Mapping*. 2017.
9. Tardif CL, Schäfer A, Waehnert M, Dinse J, Turner R, Bazin P-L. Multi-contrast multi-scale surface registration for improved alignment of cortical areas. *Neuroimage*. 2015;111:107-22.

**Figure S1. Half depth metric visualization.**

**Appendix 1** to Sehmbi M, Rowley CD, Minuzzi L, et al. Age-related deficits in intracortical myelination in young adults with bipolar disorder type I. *J Psychiatry Neurosci* 2019.

DOI: 10.1503/jpn.170220

*Online appendices are unedited and posted as supplied by the authors.*

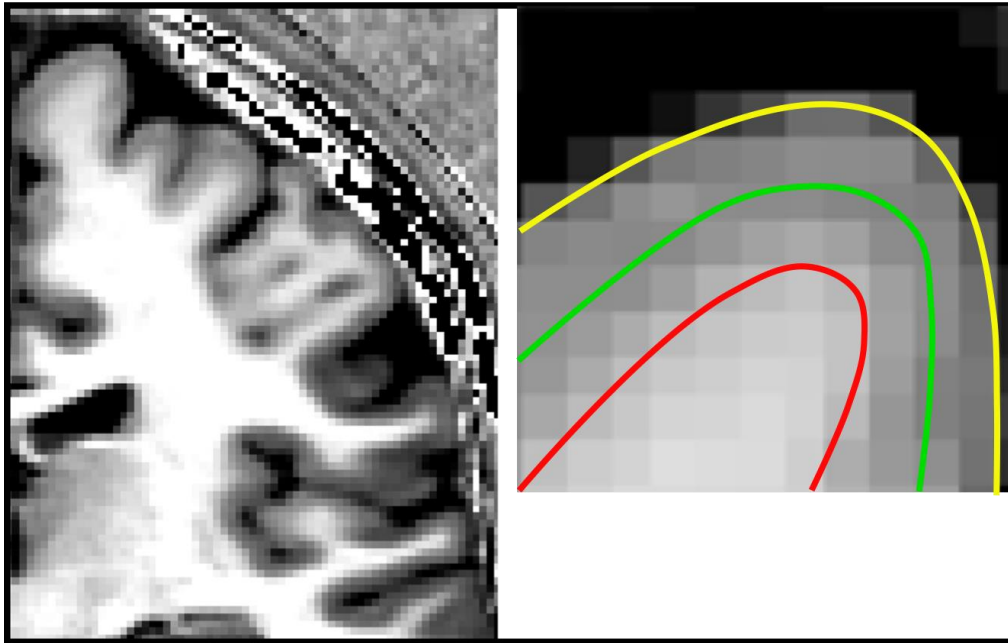

Left:  $T_1$ -weighted image with high intracortical contrast.  
Right: Illustration of the half depth signal surface, which is calculated from the pial and white matter surfaces.

**Appendix 1** to Sehmbi M, Rowley CD, Minuzzi L, et al. Age-related deficits in intracortical myelination in young adults with bipolar disorder type I. *J Psychiatry Neurosci* 2019.

DOI: 10.1503/jpn.170220

*Online appendices are unedited and posted as supplied by the authors.*

**Table S1. Significance of the Age\*DX<sup>2</sup> term with and without bootstrapping (10 000 iterations, with replacement).**

| Cortical Region                 | Left Hemisphere |           |                                                        |                                                           | Right Hemisphere |           |                                                        |                                                           |
|---------------------------------|-----------------|-----------|--------------------------------------------------------|-----------------------------------------------------------|------------------|-----------|--------------------------------------------------------|-----------------------------------------------------------|
|                                 | 2.5% CI         | 97.5% CI  | Significance of Age*DX <sup>2</sup> with bootstrapping | Significance of Age*DX <sup>2</sup> without bootstrapping | 2.5% CI          | 97.5% CI  | Significance of Age*DX <sup>2</sup> with bootstrapping | Significance of Age*DX <sup>2</sup> without bootstrapping |
| Caudal Medial Visual Cortex     | -0.000078       | 0.000001  | NS                                                     | NS                                                        | -0.000064        | 0.000012  | NS                                                     | NS                                                        |
| Lateral Visual Cortex           | -0.000065       | 0.000007  | NS                                                     | NS                                                        | -0.000078        | -0.000007 | *                                                      | *                                                         |
| Superior Visual Cortex          | -0.000071       | -0.000005 | *                                                      | NS                                                        | -0.000071        | -0.000001 | *                                                      | NS                                                        |
| Cuneus                          | -0.000071       | 0.000006  | NS                                                     | NS                                                        | -0.000071        | 0.000000  | NS                                                     | NS                                                        |
| Caudal Middle Temporal Cortex   | -0.000072       | -0.000002 | *                                                      | NS                                                        | -0.000083        | -0.000011 | *                                                      | *                                                         |
| Caudal Superior Temporal Cortex | -0.000087       | -0.000005 | *                                                      | *                                                         | -0.000085        | -0.000004 | *                                                      | *                                                         |
| Rostral Middle                  | -0.000076       | 0.000007  | NS                                                     | NS                                                        | -0.000082        | 0.000002  | NS                                                     | *                                                         |

**Appendix 1** to Sehmbi M, Rowley CD, Minuzzi L, et al. Age-related deficits in intracortical myelination in young adults with bipolar disorder type I. *J Psychiatry Neurosci* 2019.

DOI: 10.1503/jpn.170220

*Online appendices are unedited and posted as supplied by the authors.*

|                                   |           |           |    |    |           |           |    |    |
|-----------------------------------|-----------|-----------|----|----|-----------|-----------|----|----|
| Temporal Cortex                   |           |           |    |    |           |           |    |    |
| Ventral Inferior Parietal Cortex  | -0.000079 | -0.000005 | *  | *  | -0.000082 | -0.000003 | *  | *  |
| Dorsal Inferior Parietal Cortex   | -0.000071 | -0.000002 | *  | NS | -0.000080 | -0.000010 | *  | *  |
| Superior Parietal Cortex          | -0.000073 | 0.000000  | NS | NS | -0.000070 | 0.000001  | NS | NS |
| Medial Superior Parietal Cortex   | -0.000074 | -0.000005 | *  | *  | -0.000079 | -0.000009 | *  | *  |
| Medial Parietal Cortex            | -0.000082 | 0.000006  | NS | NS | -0.000081 | 0.000003  | NS | NS |
| Posterior Cingulate Cortex        | -0.000092 | 0.000005  | NS | NS | -0.000083 | 0.000017  | NS | NS |
| Ventral Somatosensory Cortex      | -0.000077 | 0.000003  | NS | NS | -0.000089 | -0.000007 | *  | *  |
| Dorsolateral Somatosensory Cortex | -0.000069 | 0.000003  | NS | NS | -0.000083 | -0.000008 | *  | *  |



**Appendix 1** to Sehmbi M, Rowley CD, Minuzzi L, et al. Age-related deficits in intracortical myelination in young adults with bipolar disorder type I. *J Psychiatry Neurosci* 2019.

DOI: 10.1503/jpn.170220

*Online appendices are unedited and posted as supplied by the authors.*

|                                       |           |           |    |    |           |           |    |    |
|---------------------------------------|-----------|-----------|----|----|-----------|-----------|----|----|
| Dorsomedial Somatosensory Cortex      | -0.000079 | -0.000006 | *  | *  | -0.000062 | 0.000011  | NS | NS |
| Ventral Motor Cortex                  | -0.000080 | 0.000003  | NS | NS | -0.000089 | -0.000006 | *  | *  |
| Dorsolateral Motor Cortex             | -0.000099 | -0.000019 | *  | *  | -0.000108 | -0.000023 | *  | *  |
| Dorsomedial Motor Cortex              | -0.000102 | -0.000018 | *  | *  | -0.000099 | -0.000010 | *  | *  |
| Rostral Ventral Premotor Cortex       | -0.000091 | -0.000006 | *  | *  | -0.000088 | 0.000001  | NS | NS |
| Dorsolateral Premotor Cortex          | -0.000104 | -0.000024 | *  | *  | -0.000096 | -0.000012 | *  | *  |
| Dorsomedial Premotor Cortex           | -0.000099 | -0.000011 | *  | *  | -0.000106 | -0.000017 | *  | *  |
| Caudal Dorsolateral Prefrontal Cortex | -0.000087 | -0.000007 | *  | *  | -0.000096 | -0.000008 | *  | *  |
| Caudal Dorsomedial                    | -0.000103 | -0.000025 | *  | *  | -0.000089 | -0.000005 | *  | *  |

**Appendix 1** to Sehmbi M, Rowley CD, Minuzzi L, et al. Age-related deficits in intracortical myelination in young adults with bipolar disorder type I. *J Psychiatry Neurosci* 2019.

DOI: 10.1503/jpn.170220

*Online appendices are unedited and posted as supplied by the authors.*

|                                                 |           |           |    |    |           |           |    |    |
|-------------------------------------------------|-----------|-----------|----|----|-----------|-----------|----|----|
| Prefrontal Cortex                               |           |           |    |    |           |           |    |    |
| Mid Cingulate Cortex                            | -0.000087 | 0.000009  | NS | NS | -0.000094 | 0.000012  | NS | NS |
| Rostral Ventrolateral Prefrontal Cortex         | -0.000086 | 0.000000  | NS | NS | -0.000084 | -0.000005 | *  | *  |
| Rostral Dorsolateral Inferior Prefrontal Cortex | -0.000071 | 0.000008  | NS | NS | -0.000098 | -0.000020 | *  | *  |
| Rostral Dorsolateral Superior Prefrontal Cortex | -0.000073 | 0.000000  | NS | NS | -0.000086 | -0.000011 | *  | *  |
| Rostral Dorsal Prefrontal Cortex                | -0.000085 | -0.000009 | *  | *  | -0.000071 | -0.000001 | *  | NS |
| Rostral Medial Prefrontal Cortex                | -0.000089 | -0.000011 | *  | *  | -0.000072 | 0.000007  | NS | NS |

**Appendix 1** to Sehmbi M, Rowley CD, Minuzzi L, et al. Age-related deficits in intracortical myelination in young adults with bipolar disorder type I. *J Psychiatry Neurosci* 2019.

DOI: 10.1503/jpn.170220

*Online appendices are unedited and posted as supplied by the authors.*

|                                     |           |           |    |    |           |           |    |    |
|-------------------------------------|-----------|-----------|----|----|-----------|-----------|----|----|
| Cortex                              |           |           |    |    |           |           |    |    |
| Ventrolateral Orbito Frontal Cortex | -0.000095 | -0.000005 | *  | *  | -0.000091 | 0.000002  | NS | NS |
| Ventral Orbito Frontal Cortex       | -0.000076 | 0.000003  | NS | NS | -0.000081 | -0.000005 | *  | *  |
| Ventromedial Orbito Frontal Cortex  | -0.000071 | 0.000012  | NS | NS | -0.000074 | -0.000001 | *  | NS |
| Ventromedial Prefrontal Cortex      | -0.000068 | 0.000007  | NS | NS | -0.000062 | 0.000010  | NS | NS |
| Anterior Cingulate Cortex           | -0.000071 | 0.000013  | NS | NS | -0.000086 | 0.000025  | NS | NS |

CI: Confidence Interval

**Appendix 1** to Sehmbi M, Rowley CD, Minuzzi L, et al. Age-related deficits in intracortical myelination in young adults with bipolar disorder type I. *J Psychiatry Neurosci* 2019.

DOI: 10.1503/jpn.170220

*Online appendices are unedited and posted as supplied by the authors.*

**Table S2. Partial correlations with age of onset (years) and duration of illness (years) in BD subjects (N=45).**

| Cortical region                  | Left hemisphere |                |                           | Right hemisphere |                |                           |
|----------------------------------|-----------------|----------------|---------------------------|------------------|----------------|---------------------------|
|                                  | Partial R       | P, uncorrected | P, corrected <sup>u</sup> | Partial R        | P, uncorrected | P, corrected <sup>u</sup> |
| <b>Age of onset</b>              |                 |                |                           |                  |                |                           |
| Superior parietal cortex         | 0.17            | 0.16           | 1                         | 0.25             | 0.04*          | 1                         |
| Medial parietal cortex           | 0.27            | 0.02*          | 1                         | 0.34             | 0.006**        | 0.38                      |
| Dorsomedial somatosensory cortex | 0.26            | 0.03*          | 1                         | 0.20             | 0.10           | 1                         |
| Dorsolateral motor cortex        | 0.23            | 0.06           | 1                         | 0.25             | 0.04*          | 1                         |
| Dorsomedial motor cortex         | 0.22            | 0.07           | 1                         | 0.26             | 0.03*          | 1                         |
| Rostral ventral premotor cortex  | 0.15            | 0.21           | 1                         | 0.26             | 0.03*          | 1                         |
| Dorsolateral premotor            | 0.26            | 0.03*          | 1                         | 0.22             | 0.07           | 1                         |

**Appendix 1** to Sehmbi M, Rowley CD, Minuzzi L, et al. Age-related deficits in intracortical myelination in young adults with bipolar disorder type I. *J Psychiatry Neurosci* 2019.

DOI: 10.1503/jpn.170220

*Online appendices are unedited and posted as supplied by the authors.*

|                                                 |      |         |      |      |         |      |
|-------------------------------------------------|------|---------|------|------|---------|------|
| cortex                                          |      |         |      |      |         |      |
| Dorsomedial premotor cortex                     | 0.36 | 0.002** | 0.17 | 0.28 | 0.02*   | 1    |
| Caudal dorsolateral prefrontal cortex           | 0.29 | 0.02*   | 1    | 0.25 | 0.04*   | 1    |
| Caudal dorsomedial prefrontal cortex            | 0.30 | 0.01    | 0.72 | 0.28 | 0.02*   | 1    |
| Rostral ventrolateral prefrontal cortex         | 0.28 | 0.02*   | 1    | 0.24 | 0.049*  | 1    |
| Rostral dorsolateral superior prefrontal cortex | 0.25 | 0.04*   | 1    | 0.21 | 0.08    | 1    |
| Rostral dorsal prefrontal cortex                | 0.27 | 0.03*   | 1    | 0.24 | 0.046*  | 1    |
| Rostral                                         | 0.36 | 0.002** | 0.14 | 0.32 | 0.007** | 0.48 |

**Appendix 1** to Sehmbi M, Rowley CD, Minuzzi L, et al. Age-related deficits in intracortical myelination in young adults with bipolar disorder type I. *J Psychiatry Neurosci* 2019.

DOI: 10.1503/jpn.170220

*Online appendices are unedited and posted as supplied by the authors.*

|                                    |       |         |      |       |         |      |
|------------------------------------|-------|---------|------|-------|---------|------|
| medial prefrontal cortex           |       |         |      |       |         |      |
| <b>Duration of illness (years)</b> |       |         |      |       |         |      |
| Caudal medial visual cortex        | -0.33 | 0.005** | 0.33 | -0.31 | 0.009** | 0.56 |
| Lateral visual cortex              | -0.26 | 0.03    | 1    | -0.32 | 0.007** | 0.43 |
| Superior visual cortex             | -0.26 | 0.03    | 1    | -0.19 | 0.11    | 1    |
| Cuneus                             | -0.33 | 0.006** | 0.38 | -0.26 | 0.03*   | 1    |
| Caudal superior temporal cortex    | -0.31 | 0.01*   | 0.60 | -0.30 | 0.01    | 0.63 |
| Dorsal inferior parietal cortex    | -0.16 | 0.19    | 1    | -0.25 | 0.03*   | 1    |
| Superior parietal cortex           | -0.21 | 0.09    | 1    | -0.29 | 0.02*   | 0.84 |
| Medial superior parietal cortex    | -0.27 | 0.02*   | 1    | -0.28 | 0.02*   | 0.85 |

**Appendix 1** to Sehmbi M, Rowley CD, Minuzzi L, et al. Age-related deficits in intracortical myelination in young adults with bipolar disorder type I. *J Psychiatry Neurosci* 2019.

DOI: 10.1503/jpn.170220

*Online appendices are unedited and posted as supplied by the authors.*

|                                  |       |         |      |       |         |      |
|----------------------------------|-------|---------|------|-------|---------|------|
| Medial parietal cortex           | -0.33 | 0.005** | 0.36 | -0.37 | 0.002** | 0.12 |
| Posterior cingulate cortex       | -0.33 | 0.005*  | 0.37 | -0.30 | 0.01*   | 0.71 |
| Dorsomedial somatosensory cortex | -0.30 | 0.01*   | 0.70 | -0.18 | 0.13    | 1    |
| Ventral motor cortex             | -0.23 | 0.05    | 1    | -0.25 | 0.04*   | 1    |
| Dorsolateral motor cortex        | -0.23 | 0.06    | 1    | -0.30 | 0.01*   | 0.73 |
| Dorsomedial motor cortex         | -0.28 | 0.02*   | 0.87 | -0.23 | 0.06    | 1    |
| Rostral ventral premotor cortex  | -0.24 | 0.049*  | 1    | -0.23 | 0.06    | 1    |
| Dorsolateral premotor cortex     | -0.27 | 0.02*   | 1    | -0.22 | 0.07    | 1    |
| Dorsomedial premotor cortex      | -0.29 | 0.01*   | 0.75 | -0.27 | 0.03*   | 1    |
| Caudal                           | -0.29 | 0.01*   | 0.75 | -0.20 | 0.09    | 1    |

**Appendix 1** to Sehmbi M, Rowley CD, Minuzzi L, et al. Age-related deficits in intracortical myelination in young adults with bipolar disorder type I. *J Psychiatry Neurosci* 2019.

DOI: 10.1503/jpn.170220

*Online appendices are unedited and posted as supplied by the authors.*

|                                                 |       |         |      |       |         |      |
|-------------------------------------------------|-------|---------|------|-------|---------|------|
| dorsomedial prefrontal cortex                   |       |         |      |       |         |      |
| Midcingulate cortex                             | -0.33 | 0.005** | 0.37 | -0.27 | 0.02*   | 1    |
| Rostral ventrolateral prefrontal cortex         | -0.24 | 0.04    | 1    | -0.18 | 0.13    | 1    |
| Rostral dorsolateral inferior prefrontal cortex | -0.25 | 0.04*   | 1    | -0.29 | 0.02*   | 0.84 |
| Rostral medial prefrontal cortex                | -0.29 | 0.02*   | 0.85 | -0.22 | 0.06    | 1    |
| Ventrolateral orbitofrontal cortex              | -0.24 | 0.048*  | 1    | -0.20 | 0.09    | 1    |
| Anterior cingulate cortex                       | -0.33 | 0.005** | 0.33 | -0.31 | 0.008** | 0.53 |

<sup>#</sup> p values corrected using Bonferroni correction.



**Appendix 1** to Sehmbi M, Rowley CD, Minuzzi L, et al. Age-related deficits in intracortical myelination in young adults with bipolar disorder type I. *J Psychiatry Neurosci* 2019.

DOI: 10.1503/jpn.170220

*Online appendices are unedited and posted as supplied by the authors.*

**Table S3. Partial correlations with number of mood episodes in BD subjects (N=45).**

| Cortical Region                     | Left hemisphere |                |                           | Right hemisphere |                |                           |
|-------------------------------------|-----------------|----------------|---------------------------|------------------|----------------|---------------------------|
|                                     | Partial R       | P, uncorrected | P, corrected <sup>u</sup> | Partial R        | P, uncorrected | P, corrected <sup>u</sup> |
| <b>Number of manic episodes</b>     |                 |                |                           |                  |                |                           |
| Rostral middle temporal cortex      | -0.17           | 0.15           | 1                         | -0.24            | 0.047*         | 1                         |
| <b>Number of hypomanic episodes</b> |                 |                |                           |                  |                |                           |
| Posterior cingulate cortex          | -0.27           | 0.03*          | 1                         | -0.31            | 0.009**        | 0.67                      |
| Anterior cingulate cortex           | -0.16           | 0.17           | 1                         | -0.27            | 0.02*          | 1                         |

**Appendix 1** to Sehmbi M, Rowley CD, Minuzzi L, et al. Age-related deficits in intracortical myelination in young adults with bipolar disorder type I. *J Psychiatry Neurosci* 2019.

DOI: 10.1503/jpn.170220

*Online appendices are unedited and posted as supplied by the authors.*

| <b>Number of mixed episodes</b>  |        |       |   |      |         |   |
|----------------------------------|--------|-------|---|------|---------|---|
| Lateral visual cortex            | 0.08   | 0.51  | 1 | 0.26 | 0.03*   | 1 |
| Superior visual cortex           | 0.09   | 0.46  | 1 | 0.27 | 0.03*   | 1 |
| Caudal middle temporal cortex    | 0.20   | 0.09  | 1 | 0.31 | 0.009** | 1 |
| Rostral middle temporal cortex   | 0.29   | 0.01* | 1 | 0.19 | 0.10    | 1 |
| Ventral inferior parietal cortex | 0.12   | 0.31  | 1 | 0.27 | 0.02*   | 1 |
| Dorsal inferior parietal cortex  | 0.10   | 0.40  | 1 | 0.26 | 0.03*   | 1 |
| Superior parietal cortex         | 0.04   | 0.77  | 1 | 0.24 | 0.045*  | 1 |
| Ventral somatosensory cortex     | 0.0009 | 0.99  | 1 | 0.29 | 0.02*   | 1 |

**Appendix 1** to Sehmbi M, Rowley CD, Minuzzi L, et al. Age-related deficits in intracortical myelination in young adults with bipolar disorder type I. *J Psychiatry Neurosci* 2019.

DOI: 10.1503/jpn.170220

*Online appendices are unedited and posted as supplied by the authors.*

|                                               |      |           |       |      |       |   |
|-----------------------------------------------|------|-----------|-------|------|-------|---|
| Dorsolateral somatosensory cortex             | 0.18 | 0.14      | 1     | 0.26 | 0.03* | 1 |
| Rostral dorsolateral inferior parietal cortex | 0.22 | 0.06      | 1     | 0.26 | 0.03* | 1 |
| Ventral orbitofrontal cortex                  | 0.33 | 0.005**   | 1     | 0.29 | 0.01* | 1 |
| Ventromedial orbitofrontal cortex             | 0.37 | 0.001**   | 1     | 0.15 | 0.21  | 1 |
| Ventromedial prefrontal cortex                | 0.42 | 0.0003*** | 0.04* | 0.18 | 0.13  | 1 |

**Appendix 1** to Sehmbi M, Rowley CD, Minuzzi L, et al. Age-related deficits in intracortical myelination in young adults with bipolar disorder type I. *J Psychiatry Neurosci* 2019.

DOI: 10.1503/jpn.170220

*Online appendices are unedited and posted as supplied by the authors.*

<sup>u</sup> p values corrected using Bonferroni correction.

**Table S4. Partial correlations with medication use in BD subjects (N=45).**

| Cortical Region                                 | Left hemisphere |                |                           | Right hemisphere |                |                           |
|-------------------------------------------------|-----------------|----------------|---------------------------|------------------|----------------|---------------------------|
|                                                 | Partial R       | P, uncorrected | P, corrected <sup>u</sup> | Partial R        | P, uncorrected | P, corrected <sup>u</sup> |
| <b>Anticonvulsant use</b>                       |                 |                |                           |                  |                |                           |
| Rostral dorsolateral inferior prefrontal cortex | -0.24           | 0.04*          | 1                         | -0.09            | 0.46           | 1                         |
| Rostral dorsal prefrontal cortex                | -0.25           | 0.04*          | 1                         | -0.25            | 0.03*          | 1                         |
| Ventromedial                                    | -0.12           | 0.34           | 1                         | -0.25            | 0.04*          | 1                         |

**Appendix 1** to Sehmbi M, Rowley CD, Minuzzi L, et al. Age-related deficits in intracortical myelination in young adults with bipolar disorder type I. *J Psychiatry Neurosci* 2019.

DOI: 10.1503/jpn.170220

*Online appendices are unedited and posted as supplied by the authors.*

|                                 |       |         |      |       |         |   |
|---------------------------------|-------|---------|------|-------|---------|---|
| orbitofrontal cortex            |       |         |      |       |         |   |
| <b>Antipsychotic use</b>        |       |         |      |       |         |   |
| Caudal medial visual cortex     | -0.33 | 0.005** | 1    | -0.16 | 0.18    | 1 |
| Cuneus                          | -0.23 | 0.06    | 1    | -0.30 | 0.01*   | 1 |
| Medial superior parietal cortex | -0.25 | 0.04*   | 1    | -0.27 | 0.02*   | 1 |
| Medial parietal cortex          | -0.14 | 0.24    | 1    | -0.25 | 0.04*   | 1 |
| Posterior cingulate cortex      | -0.29 | 0.02*   | 1    | -0.26 | 0.03*   | 1 |
| Dorsolateral motor cortex       | -0.27 | 0.02*   | 1    | -0.25 | 0.04*   | 1 |
| Midcingulate cortex             | -0.26 | 0.03*   | 1    | -0.32 | 0.008** | 1 |
| Anterior cingulate cortex       | -0.10 | 0.39    | 1    | -0.35 | 0.003** | 1 |
| <b>Total medication load</b>    |       |         |      |       |         |   |
| Caudal medial                   | -0.38 | 0.001** | 0.70 | -0.27 | 0.02*   | 1 |

**Appendix 1** to Sehmbi M, Rowley CD, Minuzzi L, et al. Age-related deficits in intracortical myelination in young adults with bipolar disorder type I. *J Psychiatry Neurosci* 2019.

DOI: 10.1503/jpn.170220

*Online appendices are unedited and posted as supplied by the authors.*

|                                   |       |         |   |       |       |   |
|-----------------------------------|-------|---------|---|-------|-------|---|
| visual cortex                     |       |         |   |       |       |   |
| Cuneus                            | -0.17 | 0.16    | 1 | -0.27 | 0.03* | 1 |
| Medial parietal cortex            | -0.13 | 0.25    | 1 | -0.28 | 0.02* | 1 |
| Posterior cingulate cortex        | -0.25 | 0.04*   | 1 | -0.22 | 0.07  | 1 |
| Dorsolateral somatosensory cortex | -0.13 | 0.28    | 1 | -0.24 | 0.04* | 1 |
| Dorsolateral motor cortex         | -0.30 | 0.01*   | 1 | -0.30 | 0.01* | 1 |
| Dorsomedial motor cortex          | -0.28 | 0.02*   | 1 | -0.28 | 0.02* | 1 |
| <b>Total medication count</b>     |       |         |   |       |       |   |
| Caudal medial visual cortex       | -0.33 | 0.006** | 1 | -0.22 | 0.06  | 1 |
| Caudal middle temporal cortex     | -0.06 | 0.62    | 1 | -0.26 | 0.03* | 1 |
| Ventral inferior parietal cortex  | -0.14 | 0.26    | 1 | -0.27 | 0.03* | 1 |
| Dorsal                            | -0.16 | 0.19    | 1 | -0.26 | 0.03* | 1 |

**Appendix 1** to Sehmbi M, Rowley CD, Minuzzi L, et al. Age-related deficits in intracortical myelination in young adults with bipolar disorder type I. *J Psychiatry Neurosci* 2019.

DOI: 10.1503/jpn.170220

*Online appendices are unedited and posted as supplied by the authors.*

|                                   |       |       |   |       |         |   |
|-----------------------------------|-------|-------|---|-------|---------|---|
| inferior parietal cortex          |       |       |   |       |         |   |
| Superior parietal cortex          | -0.13 | 0.28  | 1 | -0.24 | 0.049*  | 1 |
| Medial parietal cortex            | -0.08 | 0.50  | 1 | -0.25 | 0.03*   | 1 |
| Dorsolateral somatosensory cortex | -0.18 | 0.12  | 1 | -0.33 | 0.005** | 1 |
| Dorsomedial somatosensory cortex  | -0.17 | 0.17  | 1 | -0.25 | 0.03*   | 1 |
| Dorsolateral motor cortex         | -0.23 | 0.05  | 1 | -0.29 | 0.02*   | 1 |
| Dorsomedial motor cortex          | -0.26 | 0.03* | 1 | -0.32 | 0.008** | 1 |
| Dorsolateral premotor cortex      | -0.20 | 0.10  | 1 | -0.25 | 0.04*   | 1 |
| Dorsomedial premotor cortex       | -0.25 | 0.03* | 1 | -0.31 | 0.009** | 1 |
| Caudal                            | -0.22 | 0.06  | 1 | -0.25 | 0.04*   | 1 |

**Appendix 1** to Sehmbi M, Rowley CD, Minuzzi L, et al. Age-related deficits in intracortical myelination in young adults with bipolar disorder type I. *J Psychiatry Neurosci* 2019.

DOI: 10.1503/jpn.170220

*Online appendices are unedited and posted as supplied by the authors.*

|                                                 |       |       |   |       |      |   |
|-------------------------------------------------|-------|-------|---|-------|------|---|
| dorsomedial prefrontal cortex                   |       |       |   |       |      |   |
| Rostral dorsolateral inferior prefrontal cortex | -0.29 | 0.02* | 1 | -0.15 | 0.23 | 1 |
| Ventral orbitofrontal cortex                    | -0.31 | 0.01* | 1 | -0.22 | 0.07 | 1 |

<sup>μ</sup> p values corrected

using Bonferroni correction
